# Supplementary material
Source: PubMed Central journal article supplement (PMC7296216)
Supplement: MCB.00056-20-s0001.pdf [file MCB.00056-20-s0001.pdf]

Figure S1

A

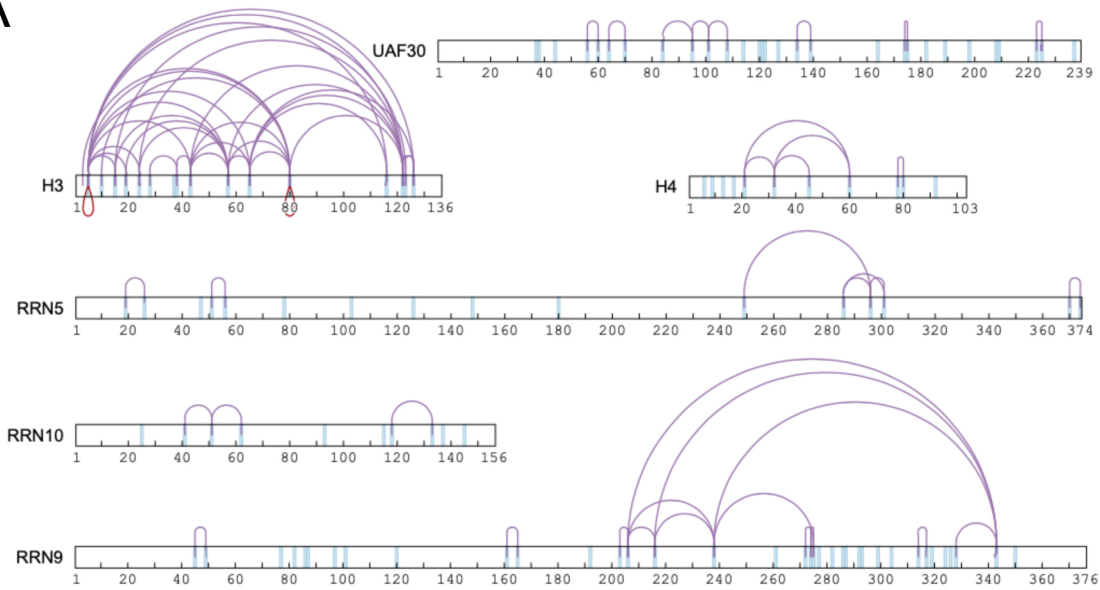

B

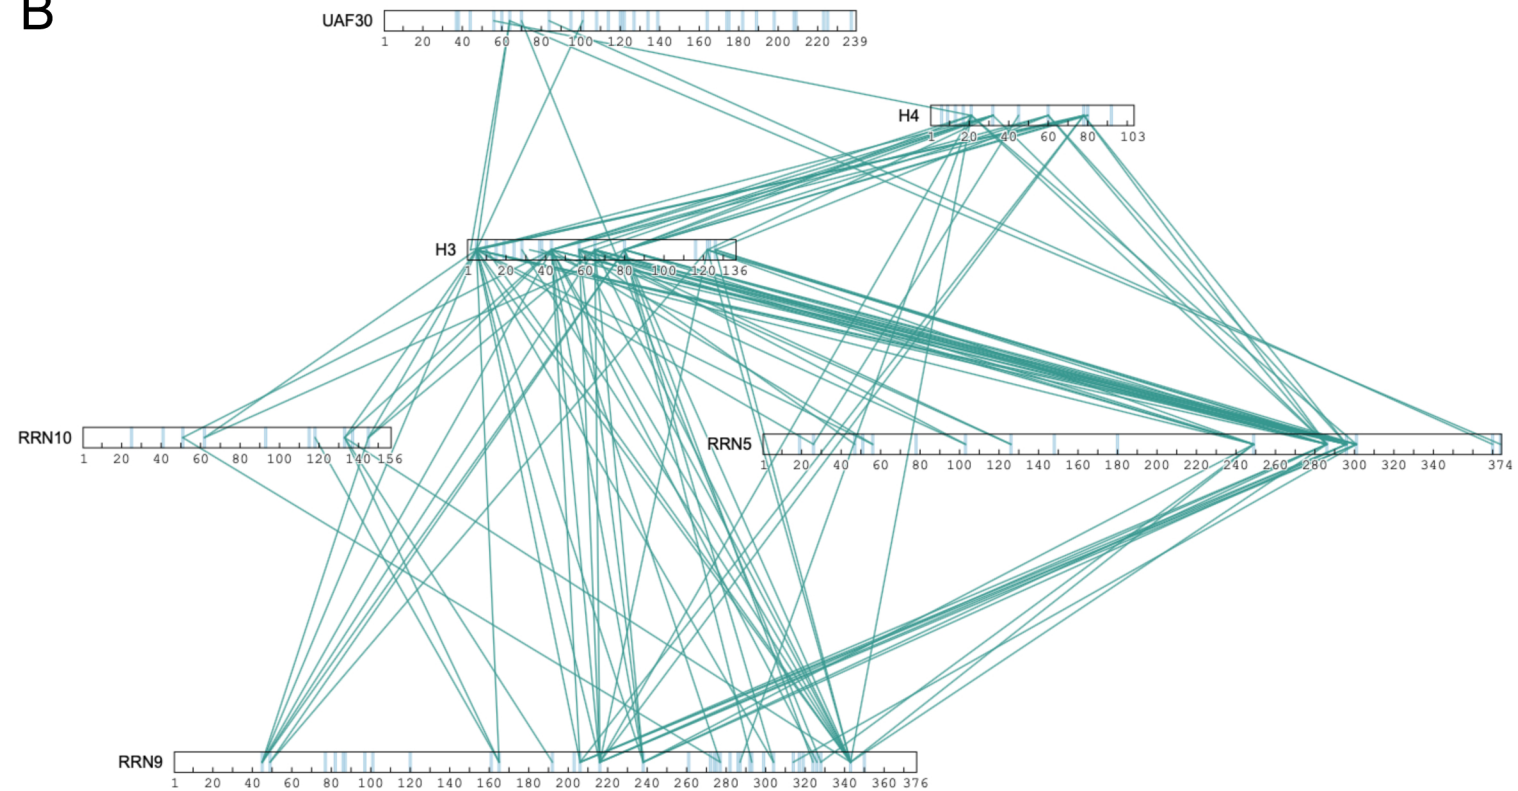

**Figure S1. Position of lysine residues in the UAF linkage map. A.** Intramolecular crosslinking within the UAF subunits. **B.** Intermolecular crosslinking between UAF subunits. The positions of the lysine residues are colored in light blue vertical lines. Intra- and Intermolecular crosslinks are depicted as purple loops and teal lines respectively. Red loops denote intra-molecular crosslinks where the same lysine in the same or similar peptides crosslink to each other.

Figure S2

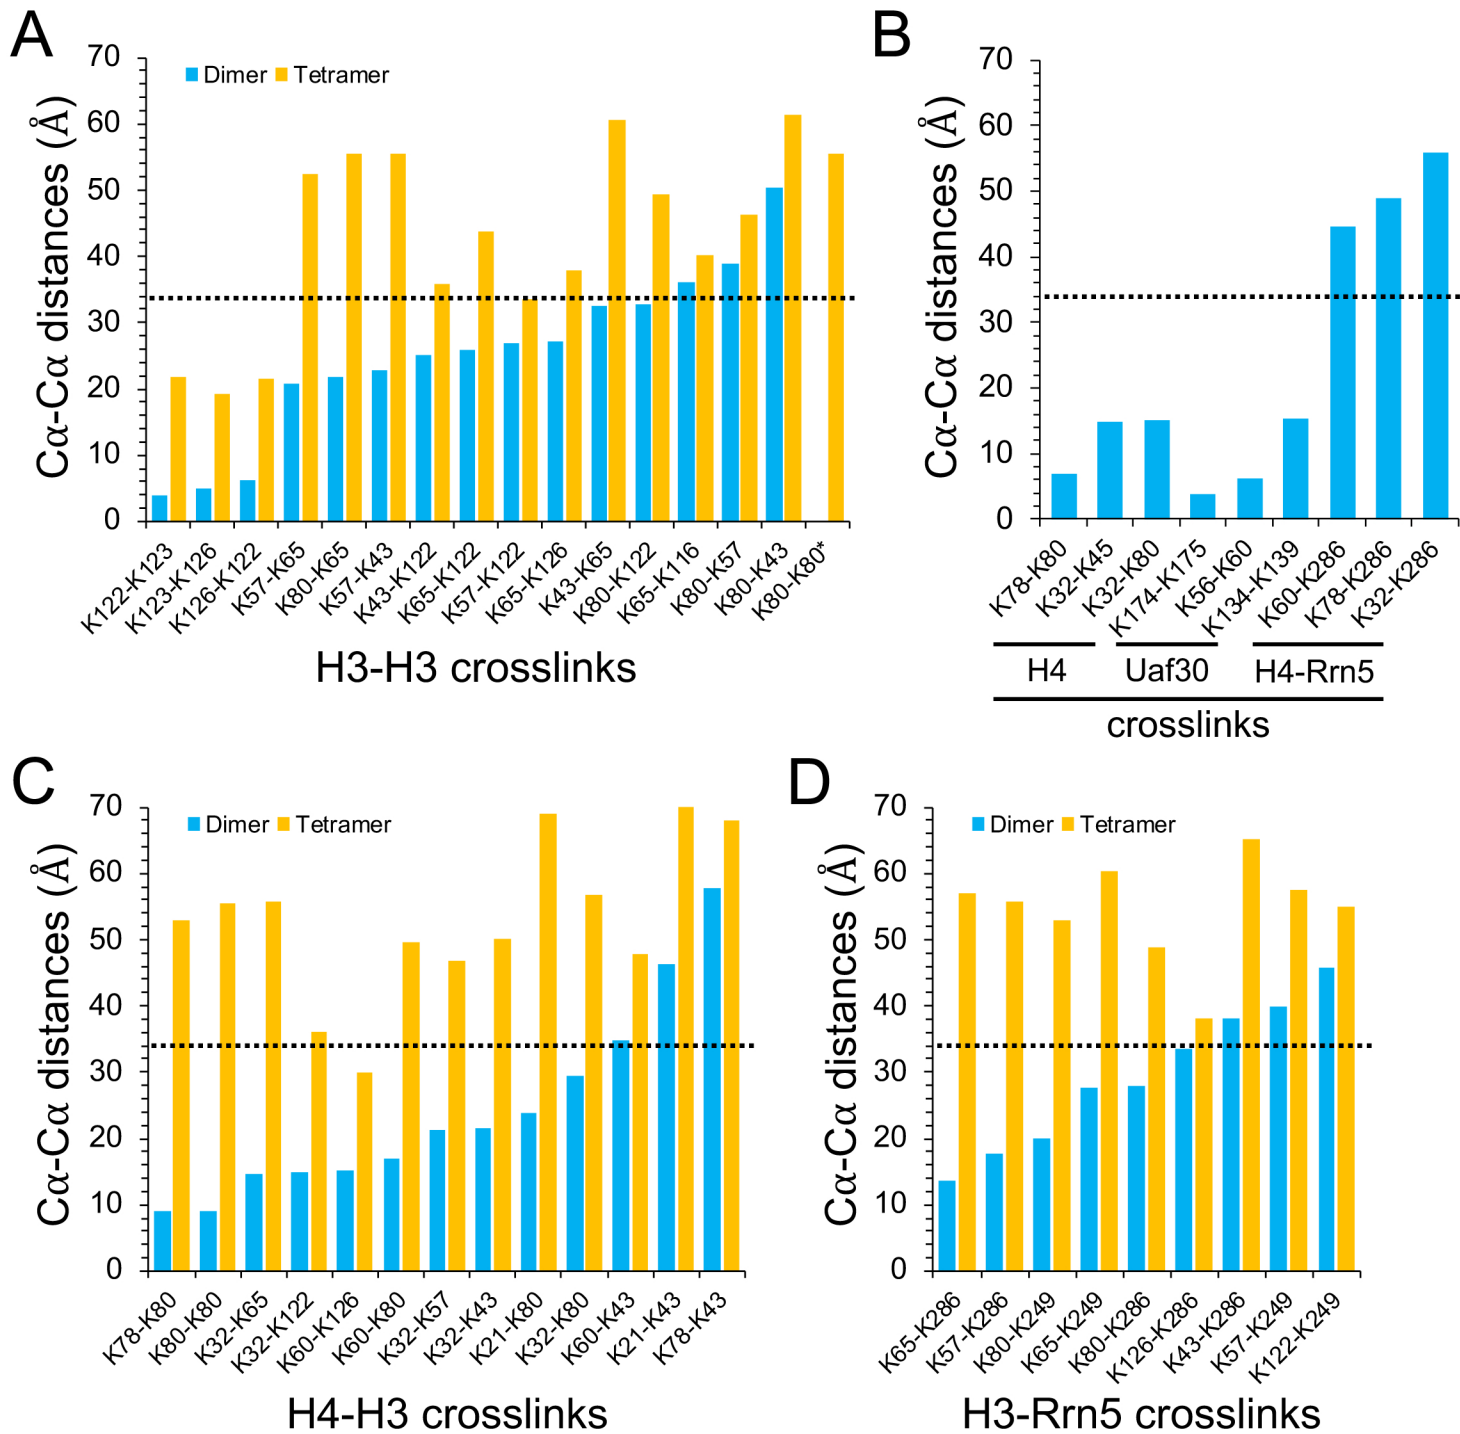

**Figure S2. Intramolecular crosslinking within and between predicted UAF structural models. A-C.** Calculated C $\alpha$ -C $\alpha$  distances between crosslinked lysines pairs with the dimer and tetrameric orientations for **(A)** H3-H4, **(B)** H3-H3, and **(C)** H3-Rrn5. **D.** Calculated C $\alpha$ -C $\alpha$  distances between crosslinked lysines pairs within H4, Uaf30 and between H4-Rrn5. The dashed line denotes the theoretical maximum crosslinking distance for BS3 of 34 Å.

**Supplementary Table S1. UAF constructs used in this study**

| <b>Construct</b>         | <b>Description</b>                                                              |
|--------------------------|---------------------------------------------------------------------------------|
| pRS425-PGK-Myc-RRN5-WT   | Wildtype RRN5 gene inserted into pRS425 PGK promoter yeast expression vector.   |
| pRS425-PGK-Myc-RRN5-D1   | Removed RRN5 DNA sequence encoding a.a. residues 5-45.                          |
| pRS425-PGK-Myc-RRN5-D2   | Removed RRN5 DNA sequence encoding a.a. residues 59-112.                        |
| pRS425-PGK-Myc-RRN5-D3   | Removed RRN5 DNA sequence encoding a.a. residues 123-177.                       |
| pRS425-PGK-Myc-RRN5-D4   | Removed RRN5 DNA sequence encoding a.a. residues 332-355.                       |
| pRS425-PGK-Myc-RRN5-D5   | Removed RRN5 DNA sequence encoding a.a. residues 236-300.                       |
| pRS425-PGK-Myc-RRN5-D6   | Removed RRN5 DNA sequence encoding a.a. residues 194-261.                       |
| pRS425-PGK-Myc-RRN5-D2,6 | Removed RRN5 DNA sequence encoding a.a. residues 59-112 & 194-261.              |
| pRS425-PGK-Myc-RRN9-WT   | Wildtype RRN9 gene inserted into pRS425 PGK promoter yeast expression vector.   |
| pRS425-PGK-Myc-RRN9-D1   | Removed RRN9 DNA sequence encoding a.a. residues 31-78.                         |
| pRS425-PGK-Myc-RRN9-D2   | Removed RRN9 DNA sequence encoding a.a. residues 128-157.                       |
| pRS425-PGK-Myc-RRN9-D3   | Removed RRN9 DNA sequence encoding a.a. residues 170-214.                       |
| pRS425-PGK-Myc-RRN9-D4   | Removed RRN9 DNA sequence encoding a.a. residues 128-214.                       |
| pRS425-PGK-Myc-RRN9-D5   | Removed RRN9 DNA sequence encoding a.a. residues 284-341.                       |
| pRS425-PGK-Myc-RRN9-D6   | Removed RRN9 DNA sequence encoding a.a. residues 241-279.                       |
| pRS425-PGK-Myc-RRN9-D7   | Removed RRN9 DNA sequence encoding a.a. residues 215-241.                       |
| pRS425-PGK-Myc-RRN10-WT  | Wildtype RRN10 gene inserted into pRS425 PGK promoter yeast expression vector.  |
| pRS425-PGK-Myc-RRN10-D1  | Removed RRN10 DNA sequence encoding a.a. residues 5-14.                         |
| pRS425-PGK-Myc-RRN10-D2  | Removed RRN10 DNA sequence encoding a.a. residues 5-33.                         |
| pRS425-PGK-Myc-RRN10-D3  | Removed RRN10 DNA sequence encoding a.a. residues 95-109.                       |
| pRS425-PGK-Myc-RRN10-D4  | Removed RRN10 DNA sequence encoding a.a. residues 128-135.                      |
| pRS425-PGK-Myc-RRN10-D5  | Removed RRN10 DNA sequence encoding a.a. residues 37-87.                        |
| pRS425-PGK-Myc-UAF30-WT  | Wildtype UAF30 gene inserted into pRS425 PGK promoter yeast expression vector.  |
| pRS425-PGK-Myc-UAF30-D1  | Removed UAF30 DNA sequence encoding a.a. residues 5-64.                         |
| pRS425-PGK-Myc-UAF30-D2  | Removed UAF30 DNA sequence encoding a.a. residues 20-64.                        |
| pRS425-PGK-Myc-UAF30-D3  | Removed UAF30 DNA sequence encoding a.a. residues 71-111.                       |
| pRS425-PGK-Myc-UAF30-D4  | Removed UAF30 DNA sequence encoding a.a. residues 120-200.                      |
| pRS425-PGK-Myc-UAF30-D5  | Removed UAF30 DNA sequence encoding a.a. residues 201-220.                      |
| pET-6his-Rrn9-WT         | Wildtype RRN9 gene inserted into pET-Duet bacteria expression vector.           |
| pET-6his-Rrn9-D1         | Removed RRN9 DNA sequence encoding a.a. residues 31-78.                         |
| pET-6his-Rrn9-D2         | Removed RRN9 DNA sequence encoding a.a. residues 128-157.                       |
| pET-6his-Rrn9-D3         | Removed RRN9 DNA sequence encoding a.a. residues 170-214.                       |
| pET-6his-Rrn9-D4         | Removed RRN9 DNA sequence encoding a.a. residues 128-214.                       |
| pET-6his-Rrn9-D5         | Removed RRN9 DNA sequence encoding a.a. residues 284-341.                       |
| pET-6his-Rrn9-D6         | Removed RRN9 DNA sequence encoding a.a. residues 241-279.                       |
| pET-6his-Rrn9-D7         | Removed RRN9 DNA sequence encoding a.a. residues 215-241.                       |
| pET-6his-Rrn5-WT         | Wildtype RRN5 gene inserted into pET-Duet bacteria expression vector.           |
| pET-6his-Rrn5-D1         | Removed RRN5 DNA sequence encoding a.a. residues 5-45.                          |
| pET-6his-Rrn5-D2         | Removed RRN5 DNA sequence encoding a.a. residues 59-112.                        |
| pET-6his-Rrn5-D5         | Removed RRN5 DNA sequence encoding a.a. residues 236-300.                       |
| pET-6his-Rrn5-D6         | Removed RRN5 DNA sequence encoding a.a. residues 194-261.                       |
| pET-6his-Rrn5-D2,6       | Removed RRN5 DNA sequence encoding a.a. residues 59-112 & 194-261.              |
| pET-6his-Uaf30-WT        | Wildtype UAF30 gene inserted into pET-Duet bacteria expression vector.          |
| pET-6his-Uaf30-D1        | Removed UAF30 DNA sequence encoding a.a. residues 5-64.                         |
| pET-6his-Uaf30-D2        | Removed UAF30 DNA sequence encoding a.a. residues 20-64.                        |
| pET-6his-Uaf30-D3        | Removed UAF30 DNA sequence encoding a.a. residues 71-111.                       |
| pET-6his-Uaf30-D4        | Removed UAF30 DNA sequence encoding a.a. residues 120-200.                      |
| pET-6his-Uaf30-D5        | Removed UAF30 DNA sequence encoding a.a. residues 201-220.                      |
| pCDF-H3-H4-RRN5          | H3, H4, and RRN5 genes inserted into the pCDF-Duet bacteria expression vector.  |
| pCDF-H3-H4-RRN10         | H3, H4, and RRN10 genes inserted into the pCDF-Duet bacteria expression vector. |
| pACYC-RRN9-UAF30-Flag    | RRN9 and UAF30 genes inserted into the pCDF-Duet bacteria expression vector.    |
| pACYC-RRN5-UAF30-Flag    | RRN5 and UAF30 genes inserted into the pCDF-Duet bacteria expression vector.    |

Supplementary Table S2. UAF intramolecular crosslinks and looplinks

| Protein 1 | Protein 2 | Link Position 1 | Link Position 2 | Type      | Peptide 1                             | Peptide 2                          |
|-----------|-----------|-----------------|-----------------|-----------|---------------------------------------|------------------------------------|
| RRN9      | RRN9      | 206             | 216             | Intralink | IAK*ENEFDVDR                          | QDK*HSNNIR                         |
| RRN9      | RRN9      | 238             | 206             | Intralink | IK*YTYHDLVSR                          | IAK*ENEFDVDR                       |
| RRN9      | RRN9      | 238             | 216             | Intralink | QDK*HSNNIR                            | IK*YTYHDLVSR                       |
| RRN9      | RRN9      | 343             | 238             | Intralink | IK*YTYHDLVSR                          | LNREETEDALNK*R                     |
| RRN9      | RRN9      | 343             | 328             | Intralink | LNREETEDALNK*R                        | SK*LQR                             |
| RRN9      | RRN9      | 343             | 206             | Intralink | LNREETEDALNK*R                        | IAK*ENEFDVDR                       |
| RRN9      | RRN9      | 238             | 275             | Intralink | RIK*YTYHDLVSR                         | YKK*R                              |
| RRN9      | RRN9      | 45              | 49              | Looplink  | GSELT TTTADK*ETLK*SANELLDLSLEHSHR     | N/A                                |
| RRN9      | RRN9      | 161             | 165             | Looplink  | VELDAQWQK*FLSK*SALDHDVTLVDDELNIPNEISR | N/A                                |
| RRN9      | RRN9      | 274             | 275             | Looplink  | SLELYNDIPEKYK*K*R                     | N/A                                |
| RRN9      | RRN9      | 203             | 206             | Looplink  | LDSLFEGLHDK*IAK*ENEFDVDR              | N/A                                |
| RRN9      | RRN9      | 272             | 274             | Looplink  | SLELYNDIPEK*YK*KR                     | N/A                                |
| RRN9      | RRN9      | 314             | 317             | Looplink  | EDFIPVEK*LLK*DK                       | N/A                                |
| RRN9      | RRN9      | 216             | 343             | Intralink | QDK*HSNNIR                            | LNREETEDALNK*R                     |
| UAF30     | UAF30     | 108             | 101             | Intralink | SSGEEK*NDSETK                         | EITVSK*R                           |
| UAF30     | UAF30     | 174             | 175             | Looplink  | AHNLQNPNNK*K*EILCDEK                  | N/A                                |
| UAF30     | UAF30     | 95              | 101             | Looplink  | SLEDLLKENATLAIELTK*EITVSK*R           | N/A                                |
| UAF30     | UAF30     | 223             | 225             | Looplink  | RK*EK*PIVSDSEQSDTK                    | N/A                                |
| UAF30     | UAF30     | 56              | 60              | Looplink  | MALKEVY AIDVESQ GK*AINK*LIR           | N/A                                |
| UAF30     | UAF30     | 134             | 139             | Looplink  | K*VTLSK*SLASLLGEHELTR                 | N/A                                |
| UAF30     | UAF30     | 84              | 95              | Looplink  | SLEDLLK*ENATLAIELTK*EITVSKR           | N/A                                |
| UAF30     | UAF30     | 64              | 70              | Looplink  | K*HLDLVK*ERPR                         | N/A                                |
| RRN5      | RRN5      | 286             | 296             | Intralink | K*WELDYPR                             | EGK*LFR                            |
| RRN5      | RRN5      | 301             | 296             | Intralink | EGK*LFR                               | TK*EMAHFLQSQLSR                    |
| RRN5      | RRN5      | 301             | 286             | Intralink | K*WELDYPR                             | TK*EMAHFLQSQLSR                    |
| RRN5      | RRN5      | 249             | 296             | Intralink | GHK*SLPTVVTR                          | EGK*LFR                            |
| RRN5      | RRN5      | 370             | 374             | Looplink  | SALHENLLK*WLSK*                       | N/A                                |
| RRN5      | RRN5      | 51              | 56              | Looplink  | VHVK*SIHEK*AGTANAGVEISSVGVWDWSEEK     | N/A                                |
| RRN5      | RRN5      | 19              | 26              | Looplink  | K*YVELYNK*EVVEEFYNGAASGR              | N/A                                |
| RRN10     | RRN10     | 62              | 51              | Intralink | IDNAVPIPFK*TR                         | EEIDADVEK*DRNEGVFEGNIIPDIDL R      |
| RRN10     | RRN10     | 118             | 133             | Intralink | WVK*DYLTSIQTEQGR                      | QSK*VIGK                           |
| RRN10     | RRN10     | 41              | 51              | Looplink  | EFGTHVVSADVEVLAEK*IDNAVPIPFK*TR       | N/A                                |
| H4        | H4        | 60              | 32              | Intralink | DNIQGITK*PAIR                         | AVLK*SFLESVIR                      |
| H4        | H4        | 60              | 21              | Intralink | AVLK*SFLESVIR                         | K*ILR                              |
| H4        | H4        | 32              | 45              | Intralink | DNIQGITK*PAIR                         | RGGVK*R(                           |
| H4        | H4        | 32              | 21              | Looplink  | K*ILRDNIQGITK*PAIR                    | N/A                                |
| H4        | H4        | 80              | 78              | Intralink | K*TVTSLDVVYALK                        | DSVTTYTEHAK*R                      |
| H3        | H3        | 5               | 5               | Intralink | TK*QTAR                               | TK*QTAR                            |
| H3        | H3        | 5               | 19              | Intralink | TK*QTAR                               | K*QLASK                            |
| H3        | H3        | 5               | 24              | Intralink | TK*QTAR                               | QLASK*AAR                          |
| H3        | H3        | 15              | 5               | Intralink | STGGK*APR                             | TK*QTAR                            |
| H3        | H3        | 19              | 57              | Intralink | K*QLASKAAR                            | RFQK*STELLIR                       |
| H3        | H3        | 24              | 122             | Intralink | QLASK*AAR                             | VTIQK*K                            |
| H3        | H3        | 28              | 38              | Intralink | K*SAPSTGGVK                           | K*PHR                              |
| H3        | H3        | 43              | 5               | Intralink | YK*PGTVALR                            | TK*QTAR                            |
| H3        | H3        | 43              | 38              | Intralink | YK*PGTVALR                            | K*PHR                              |
| H3        | H3        | 43              | 65              | Intralink | YK*PGTVALR                            | K*LPFQR                            |
| H3        | H3        | 43              | 122             | Intralink | YK*PGTVALR                            | VTIQK*K                            |
| H3        | H3        | 57              | 5               | Intralink | FQK*STELLIR                           | TK*QTAR                            |
| H3        | H3        | 57              | 24              | Intralink | RFQK*STELLIR                          | KQLASK*AAR                         |
| H3        | H3        | 57              | 15              | Intralink | RFQK*STELLIR                          | KSTGGK*APR                         |
| H3        | H3        | 57              | 43              | Intralink | FQK*STELLIR                           | YK*PGTVALR                         |
| H3        | H3        | 57              | 65              | Intralink | FQK*STELLIR                           | K*LPFQR                            |
| H3        | H3        | 57              | 122             | Intralink | FQK*STELLIR                           | VTIQK*K                            |
| H3        | H3        | 65              | 5               | Intralink | K*LPFQR                               | TK*QTAR                            |
| H3        | H3        | 65              | 126             | Intralink | K*LPFQR                               | DIK*LAR                            |
| H3        | H3        | 65              | 122             | Intralink | K*LPFQR                               | VTIQK*K                            |
| H3        | H3        | 65              | 116             | Intralink | K*LPFQR                               | FQSSAIGALQESVEAYLVSLFEDTNLAAIHAK*R |
| H3        | H3        | 80              | 57              | Intralink | EIAQDFK*TDLR                          | RFQK*STELLIR                       |
| H3        | H3        | 80              | 122             | Intralink | EIAQDFK*TDLR                          | VTIQK*K                            |
| H3        | H3        | 116             | 5               | Intralink | FQSSAIGALQESVEAYLVSLFEDTNLAAIHAK*R    | TK*QTAR                            |
| H3        | H3        | 122             | 123             | Looplink  | VTIQK*K*DIKLAR                        | N/A                                |
| H3        | H3        | 122             | 5               | Intralink | RVTIQK*K                              | TK*QTAR                            |
| H3        | H3        | 123             | 15              | Intralink | VTIQKK*DIK                            | KSTGGK*APR                         |
| H3        | H3        | 123             | 126             | Looplink  | VTIQKK*DIK*LAR                        | N/A                                |
| H3        | H3        | 126             | 5               | Intralink | DIK*LAR                               | TK*QTAR                            |
| H3        | H3        | 126             | 122             | Intralink | DIK*LAR                               | VTIQK*K                            |
| H3        | H3        | 80              | 80              | Intralink | EIAQDFK*TDLR                          | EIAQDFK*TDLR                       |
| H3        | H3        | 80              | 65              | Intralink | EIAQDFK*TDLR                          | K*LPFQR                            |
| H3        | H3        | 80              | 10              | Intralink | EIAQDFK*TDLR                          | K*STGGK                            |
| H3        | H3        | 80              | 5               | Intralink | EIAQDFK*TDLR                          | TK*QTAR                            |
| H3        | H3        | 80              | 43              | Intralink | EIAQDFK*TDLR                          | YK*PGTVALR                         |

Supplementary Table S3. UAF intermolecular crosslinks

| Protein 1 | Protein 2 | Link Position 1 | Link Position 2 | Peptide 1                       | Peptide 2                 |
|-----------|-----------|-----------------|-----------------|---------------------------------|---------------------------|
| UAF30     | H3        | 101             |                 | 5 EITVSK'R                      | TK*QTAR                   |
| UAF30     | H3        | 64              |                 | 5 K*HLDLVK                      | TK*QTAR                   |
| UAF30     | RRN9      | 70              |                 | 328 HLDLVK'ER                   | SK*LQR                    |
| UAF30     | H4        | 56              |                 | 21 EYVAIDVESQGK'AINK            | HRK*ILR                   |
| UAF30     | RRN5      | 64              |                 | 374 K*HLDLVK                    | WLSK*                     |
| UAF30     | RRN5      | 84              |                 | 370 SLEDLLK*ENATLAIELTK         | SALHENQLLK*WLSK           |
| RRN9      | RRN10     | 165             |                 | 133 FLSK*SALDHDVTLDVDELNIPNEISR | QSK*VIGK                  |
| RRN10     | RRN9      | 145             |                 | 45 GPCEFIISK*HIDYR              | GSELTITTTADK*ETLK         |
| RRN10     | RRN9      | 51              |                 | 277 IDNAVPIPFK*TR               | RK*FR                     |
| RRN9      | RRN10     | 343             |                 | 133 LNREETEDALNK'R              | QSK*VIGK                  |
| RRN9      | RRN10     | 192             |                 | 133 NILVK*LDLFLFGLHDK           | QSK*VIGK                  |
| RRN9      | RRN10     | 165             |                 | 118 FLSK*SALDHDVTLDVDELNIPNEISR | WWK*DYLSIQTEQGR           |
| RRN5      | RRN9      | 249             |                 | 328 GHK*SLPTVVTR                | SK*LQR                    |
| RRN9      | RRN5      | 238             |                 | 296 IK*YTYHDLVSR                | EGK*LFR                   |
| RRN9      | RRN5      | 216             |                 | 286 QDK*HSNNIR                  | K*WELDYPR                 |
| RRN5      | RRN9      | 301             |                 | 314 TK*EMAHFLFQSQLSR            | EDIPIVEK*LLK              |
| RRN5      | RRN9      | 301             |                 | 206 TK*EMAHFLFQSQLSR            | IAK*ENEFDVR               |
| RRN5      | RRN9      | 301             |                 | 216 TK*EMAHFLFQSQLSR            | QDK*HSNNIR                |
| RRN9      | RRN5      | 206             |                 | 296 IAK*ENEFDVR                 | EGK*LFR                   |
| RRN9      | RRN5      | 206             |                 | 286 IAK*ENEFDVR                 | K*WELDYPR                 |
| RRN9      | RRN5      | 238             |                 | 286 IK*YTYHDLVSR                | K*WELDYPR                 |
| RRN9      | RRN5      | 343             |                 | 249 LNREETEDALNK'R              | GHK*SLPTVVTR              |
| RRN9      | RRN5      | 343             |                 | 286 LNREETEDALNK'R              | K*WELDYPR                 |
| RRN9      | RRN5      | 216             |                 | 296 QDK*HSNNIR                  | EGK*LFR                   |
| RRN5      | RRN9      | 249             |                 | 238 GHK*SLPTVVTR                | IK*YTYHDLVSR              |
| H4        | RRN5      | 60              |                 | 286 AVLK'SFLESVIR               | K*WELDYPR                 |
| H4        | RRN5      | 78              |                 | 296 DSVTYTEHAK'R                | EGK*LFR                   |
| H4        | RRN5      | 78              |                 | 286 DSVTYTEHAK'R                | K*WELDYPR                 |
| RRN5      | H4        | 301             |                 | 21 TK*EMAHFLFQSQLSR             | K*ILR                     |
| H4        | RRN5      | 60              |                 | 296 AVLK'SFLESVIR               | EGK*LFR                   |
| H4        | RRN5      | 32              |                 | 286 DNIQGITK*PAIR               | K*WELDYPR                 |
| RRN5      | H4        | 286             |                 | 21 K*WELDYPR                    | K*ILR                     |
| H4        | RRN5      | 45              |                 | 26 RGGVK'R                      | YVELYNK*VEEFYNGAASGR      |
| H4        | RRN9      | 78              |                 | 206 DSVTYTEHAK'R                | K*WELDYPR                 |
| H4        | RRN9      | 78              |                 | 216 DSVTYTEHAK'R                | QDK*HSNNIR                |
| RRN9      | H4        | 343             |                 | 21 LNREETEDALNK'R               | K*ILR                     |
| RRN9      | H4        | 216             |                 | 21 QDK*HSNNIR                   | K*ILR                     |
| H4        | RRN9      | 21              |                 | 287 RHRK*ILR                    | K*YHQPQ                   |
| RRN10     | H3        | 145             |                 | 65 GPCEFIISK*HIDYR              | YK*PGTVALR                |
| RRN10     | H3        | 145             |                 | 5 GPCEFIISK*HIDYR               | TK*QTAR                   |
| RRN10     | H3        | 145             |                 | 43 GPCEFIISK*HIDYR              | YK*PGTVALR                |
| RRN10     | H3        | 62              |                 | 80 EEIADAVEK*DRNEGVEFEGNIIPDIDL | EIAQDFK*TDLR              |
| RRN10     | H3        | 62              |                 | 5 TREEIADAVEK*DR                | TK*QTAR                   |
| RRN10     | H3        | 133             |                 | 5 QSK*VIGK                      | TK*QTAR                   |
| H3        | RRN10     | 43              |                 | 133 YK*PGTVALR                  | QSK*VIGK                  |
| H3        | RRN10     | 43              |                 | 51 PHRYK*PGTVALR                | IDNAVPIPFK*TR             |
| H4        | H3        | 60              |                 | 80 AVLK'SFLESVIR                | EIAQDFK*TDLR              |
| H4        | H3        | 32              |                 | 65 DNIQGITK*PAIR                | K*LPFOR                   |
| H4        | H3        | 32              |                 | 5 DNIQGITK*PAIR                 | TK*QTAR                   |
| H4        | H3        | 32              |                 | 122 DNIQGITK*PAIR               | VTIQK*K                   |
| H4        | H3        | 78              |                 | 5 DSVTYTEHAK'R                  | TK*QTAR                   |
| H4        | H3        | 78              |                 | 43 DSVTYTEHAK'R                 | YK*PGTVALR                |
| H4        | H3        | 78              |                 | 80 DSVTYTEHAK'R                 | K*TVTSLDVIYALK            |
| H3        | H4        | 80              |                 | 21 EIAQDFK*TDLR                 | K*ILR                     |
| H4        | H3        | 80              |                 | 80 K*TVTSLDVIYALK               | EIAQDFK*TDLR              |
| H4        | H3        | 80              |                 | 5 K*TVTSLDVIYALK                | TK*QTAR                   |
| H4        | H3        | 32              |                 | 57 DNIQGITK*PAIR                | FOK*STELLIR               |
| H4        | H3        | 32              |                 | 43 DNIQGITK*PAIR                | YK*PGTVALR                |
| H3        | H4        | 80              |                 | 32 EIAQDFK*TDLR                 | DNIQGITK*PAIR             |
| H4        | H3        | 43              |                 | 21 YK*PGTVALR                   | K*ILR                     |
| H4        | H3        | 60              |                 | 128 AVLK'SFLESVIR               | DIK*LAR                   |
| H3        | RRN5      | 126             |                 | 43 AVLK'SFLESVIR                | YK*PGTVALR                |
| H3        | RRN5      | 126             |                 | 286 DIK*LAR                     | K*WELDYPR                 |
| H3        | RRN5      | 5               |                 | 286 TK*QTAR                     | K*WELDYPR                 |
| H3        | RRN5      | 65              |                 | 103 K*LPFOR                     | K*SAMEILGYR               |
| H3        | RRN5      | 43              |                 | 296 YK*PGTVALR                  | EGK*LFR                   |
| H3        | RRN5      | 65              |                 | 296 K*LPFOR                     | EGK*LFR                   |
| H3        | RRN5      | 57              |                 | 47 RFOK*STELLIR                 | VEEFYNGAASGRPAEFHPSK*VHVK |
| H3        | RRN5      | 126             |                 | 286 DIK*LARR                    | EGK*LFR*EMAHFLFQSQLSR     |
| H3        | RRN5      | 6               |                 | 301 TK*QTAR                     | TK*EMAHFLFQSQLSR          |
| H3        | RRN5      | 122             |                 | 301 VTIQK*K                     | TK*EMAHFLFQSQLSR          |
| H3        | RRN5      | 43              |                 | 301 YK*PGTVALR                  | TK*EMAHFLFQSQLSR          |
| H3        | RRN5      | 5               |                 | 249 TK*QTAR                     | GHK*SLPTVVTR              |
| H3        | RRN5      | 122             |                 | 249 RVTIQK*K                    | GHK*SLPTVVTR              |
| RRN5      | H3        | 296             |                 | 5 EGK*LFR                       | TK*QTAR                   |
| RRN5      | H3        | 296             |                 | 122 EGK*LFR                     | RVTIQK*K                  |
| H3        | RRN5      | 80              |                 | 249 EIAQDFK*TDLR                | GHK*SLPTVVTR              |
| H3        | RRN5      | 57              |                 | 296 FOK*STELLIR                 | EGK*LFR                   |
| H3        | RRN5      | 80              |                 | 286 K*WELDYPR                   | EIAQDFK*TDLR              |
| RRN5      | H3        | 126             |                 | 57 K*AGDGDGAPIYEMSAEWVALETK     | FOK*STELLIR               |
| RRN5      | H3        | 126             |                 | 65 K*AGDGDGAPIYEMSAEWVALETK     | K*LPFOR                   |
| RRN5      | H3        | 103             |                 | K*SAMEILGYR                     | K*PHR                     |
| RRN5      | H3        | 286             |                 | 65 K*WELDYPR                    | K*LPFOR                   |
| RRN5      | H3        | 286             |                 | 43 K*WELDYPR                    | YK*PGTVALR                |
| RRN5      | H3        | 56              |                 | 43 SIHEK*AGTANAGVEISSVGDWDSEEK  | YK*PGTVALR                |
| RRN5      | H3        | 301             |                 | 80 TK*EMAHFLFQSQLSR             | EIAQDFK*TDLR              |
| RRN5      | H3        | 301             |                 | 57 TK*EMAHFLFQSQLSR             | FOK*STELLIR               |
| RRN5      | H3        | 301             |                 | 65 TK*EMAHFLFQSQLSR             | K*LPFOR                   |
| RRN5      | H3        | 26              |                 | 5 YVELYNK*VEEFYNGAASGR(7)       | TK*QTAR                   |
| H3        | RRN5      | 80              |                 | 296 EIAQDFK*TDLR                | EGK*LFR                   |
| H3        | RRN5      | 57              |                 | 249 FOK*STELLIR                 | GHK*SLPTVVTR              |
| RRN5      | H3        | 249             |                 | 65 GHK*SLPTVVTR                 | K*LPFOR                   |
| H3        | RRN5      | 57              |                 | 286 FOK*STELLIR                 | K*WELDYPR                 |
| RRN5      | H3        | 56              |                 | 5 SIHEK*AGTANAGVEISSVGDWDSEEK   | TK*QTAR                   |
| RRN9      | H3        | 343             |                 | 65 LNREETEDALNK'R               | K*LPFOR                   |
| RRN9      | H3        | 343             |                 | 122 LNREETEDALNK'R              | VTIQK*K                   |
| H3        | RRN9      | 80              |                 | 343 EIAQDFK*TDLR                | LNREETEDALNK'R            |
| H3        | RRN9      | 80              |                 | 293 EIAQDFK*TDLR                | K*TSSYLK                  |
| RRN9      | H3        | 304             |                 | 5 ELLSK*TR                      | TK*QTAR                   |
| RRN9      | H3        | 165             |                 | 5 FLSK*SALDHDVTLDVDELNIPNEISR   | TK*QTAR                   |
| H3        | RRN9      | 57              |                 | 216 FOK*STELLIR                 | QDK*HSNNIR                |
| RRN9      | H3        | 45              |                 | 80 GSELTITTTADK*ETLK            | EIAQDFK*TDLR              |
| RRN9      | H3        | 45              |                 | 65 GSELTITTTADK*ETLK            | K*LPFOR                   |
| RRN9      | H3        | 45              |                 | 5 GSELTITTTADK*ETLK             | TK*QTAR                   |
| RRN9      | H3        | 45              |                 | 43 GSELTITTTADK*ETLK            | YK*PGTVALR                |
| RRN9      | H3        | 206             |                 | 5 IAK*ENEFDVR                   | TK*QTAR                   |
| RRN9      | H3        | 206             |                 | 43 IAK*ENEFDVR                  | YK*PGTVALR                |
| RRN9      | H3        | 238             |                 | 57 IK*YTYHDLVSR                 | FOK*STELLIR               |
| RRN9      | H3        | 238             |                 | 65 IK*YTYHDLVSR                 | K*LPFOR                   |
| RRN9      | H3        | 238             |                 | 43 IK*YTYHDLVSR                 | YK*PGTVALR                |
| RRN9      | H3        | 343             |                 | 126 LNREETEDALNK'R              | DIK*LAR                   |
| RRN9      | H3        | 343             |                 | 57 LNREETEDALNK'R               | FOK*STELLIR               |
| RRN9      | H3        | 343             |                 | 10 LNREETEDALNK'R               | K*STGGK                   |
| H3        | RRN9      | 43              |                 | 277 PHRYK*PGTVALR               | RK*FR                     |
| RRN9      | H3        | 343             |                 | 5 LNREETEDALNK'R                | TK*QTAR                   |
| H3        | RRN9      | 65              |                 | 216 K*LPFOR                     | QDK*HSNNIR                |
| RRN9      | H3        | 216             |                 | 5 QDK*HSNNIR                    | TK*QTAR                   |
| RRN9      | H3        | 216             |                 | 43 QDK*HSNNIR                   | YK*PGTVALR                |
| H3        | RRN9      | 80              |                 | 304 EIAQDFK*TDLR                | ELLSK*TR                  |
| H3        | RRN9      | 5               |                 | 343 TK*QTAR                     | EETEDALNK'R               |
| RRN9      | H3        | 49              |                 | 122 ETLK*SANELLDLSLESHR         | VTIQK*K                   |
| RRN9      | H3        | 238             |                 | 5 IK*YTYHDLVSR                  | TK*QTAR                   |
| H3        | RRN9      | 28              |                 | 343 K*SAPSTGGVK                 | LNREETEDALNK'R            |
| H3        | RRN9      | 80              |                 | 49 EIAQDFK*TDLR                 | ETLK*SANELLDLSLESHR       |
| H3        | RRN9      | 43              |                 | 326 PHRYK*PGTVALR               | LTSKDK*SK                 |
| H3        | RRN9      | 80              |                 | 324 EIAQDFK*TDLR                | LTSK*DK                   |
| RRN9      | H3        | 216             |                 | 122 QDK*HSNNIR                  | VTIQK*K                   |
| RRN9      | H3        | 343             |                 | 43 LNREETEDALNK'R               | YK*PGTVALR                |
